# Supplementary material
Source: publisher figshare collection journal article supplement (https://acs.figshare.com/ndownloader/files/14111822)
Supplement: Supplementary file 1 [file 14111822]

**Vasodilator Hydralazine Promotes Nanoparticle Penetration in Advanced Desmoplastic Tumor**

Yanzuo Chen,<sup>†, ‡</sup> Wantong Song,<sup>†, §, \*</sup> Limei Shen,<sup>†</sup> Nasha Qiu,<sup>†, ||</sup> Mengying Hu,<sup>†</sup> Yun Liu,<sup>†</sup> Qi Liu<sup>†</sup> and Leaf Huang<sup>†, \*</sup>

<sup>†</sup> Division of Pharmacoengineering and Molecular Pharmaceutics and Center for Nanotechnology in Drug Delivery,

Eshelman School of Pharmacy, University of North Carolina at Chapel Hill, Chapel Hill, North Carolina 27599, United States

<sup>‡</sup> Department of Pharmaceutics, School of Pharmacy, East China University of Science and Technology, Shanghai 200237, China

<sup>§</sup> Key Laboratory of Polymer Ecomaterials, Changchun Institute of Applied Chemistry, Chinese Academy of Sciences, Changchun 130022, China

<sup>||</sup> Institute of Pharmaceutics, College of Pharmaceutical Sciences, Zhejiang University, Hangzhou 310058, China

\*Corresponding authors: wtsong@ciac.ac.cn, leafh@email.unc.edu

## Supporting Information

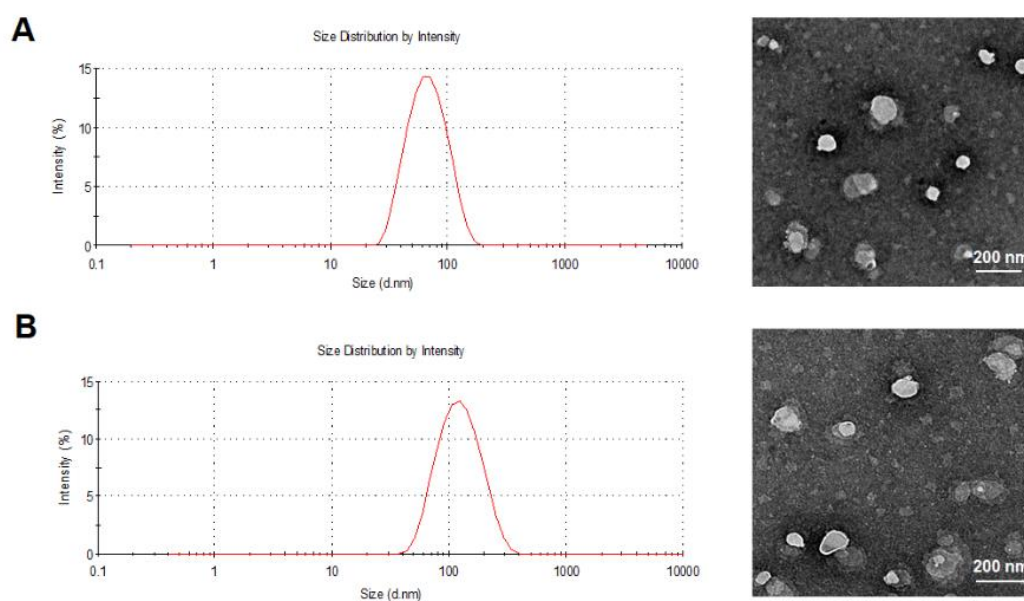

**Figure S1. DLS and TEM results of the HDZ-liposomes.** DLS and TEM depicting size and morphology of (A) empty-liposomes after extrusion ( $\sim 75$  nm), and (B) HDZ-liposomes after 30 days' storage ( $\sim 101$  nm), respectively.

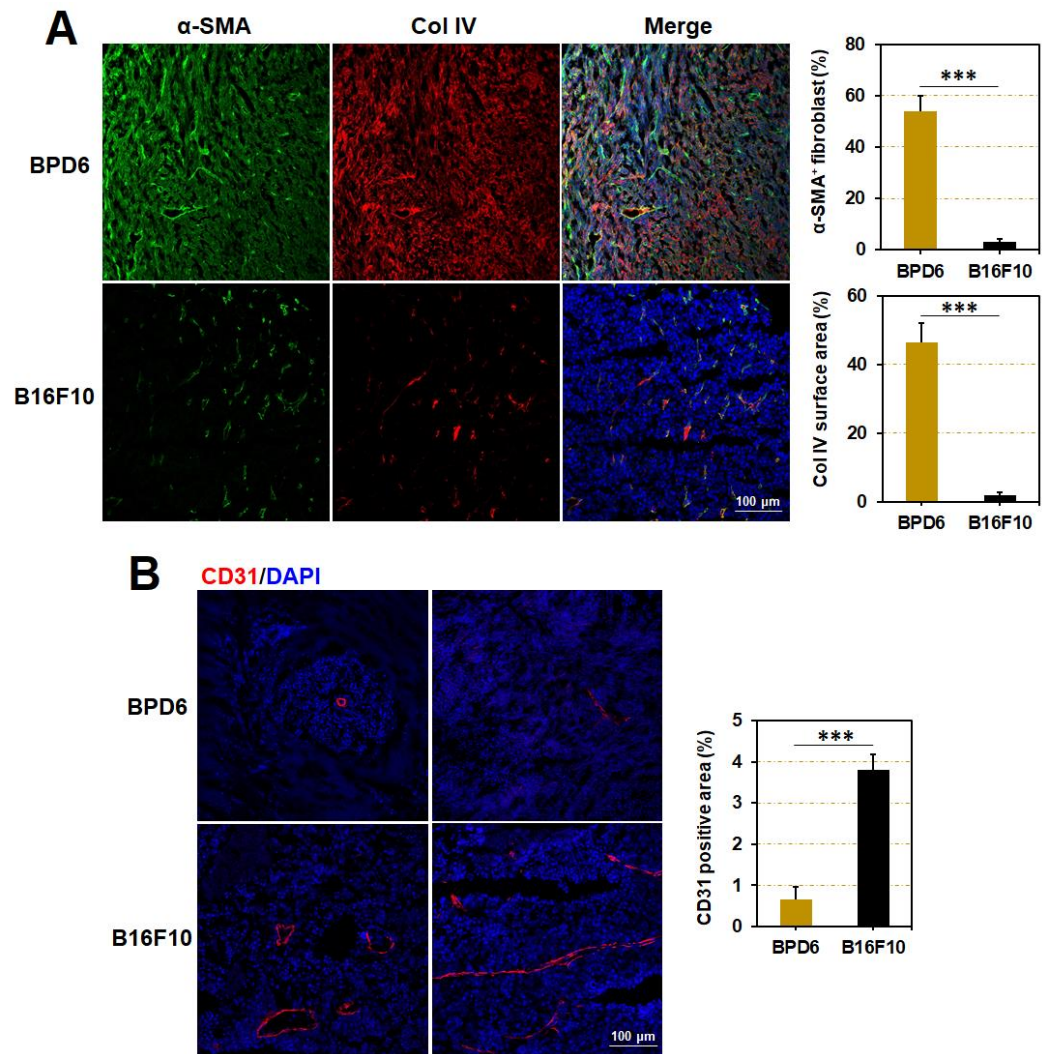

**Figure S2. Histological analysis of desmoplastic (BPD6) and wide-type (B16F10) melanoma tumors.** (A) Immunostaining of  $\alpha$ -SMA (green), collagen IV (red), and DAPI (blue). (B) Immunostaining of CD31 positive (red) vessels. n = 5; \*p < 0.05, \*\* p < 0.01, \*\*\* p < 0.001.

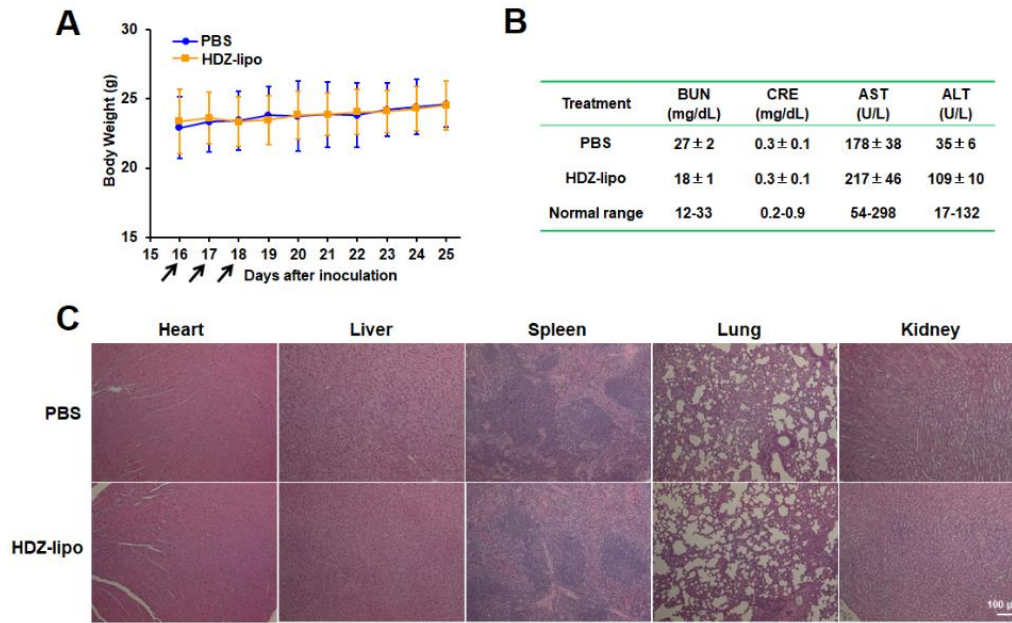

**Figure S3. Toxicity evaluation of HDZ-liposomes.** (A) BPD6 tumor-bearing mice body weight changes after three i.v. injections of HDZ-liposomes (black arrows). (B) Serum BUN, CRE, AST and ALT levels. (C) Pathological analyses of heart, liver, spleen, lung and kidney of the BPD6 tumor-bearing mice in the PBS and HDZ-liposome treated groups 7 days post injection.

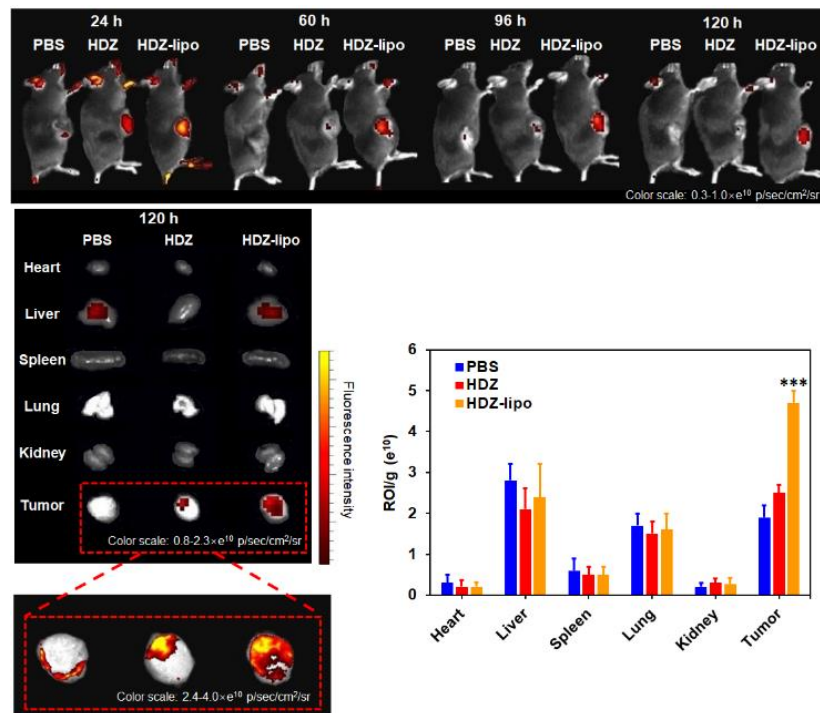

**Figure S4. *In vivo* and *ex vivo* images of DiD-loaded liposomes in BPD6 tumor-bearing mice at 24 to 120 h post injection.** Mice were pre-treated with PBS, HDZ and HDZ-liposomes, respectively. n = 3 mice per group; \*p < 0.05, \*\*p < 0.01, \*\*\*p < 0.001, compared to PBS group.

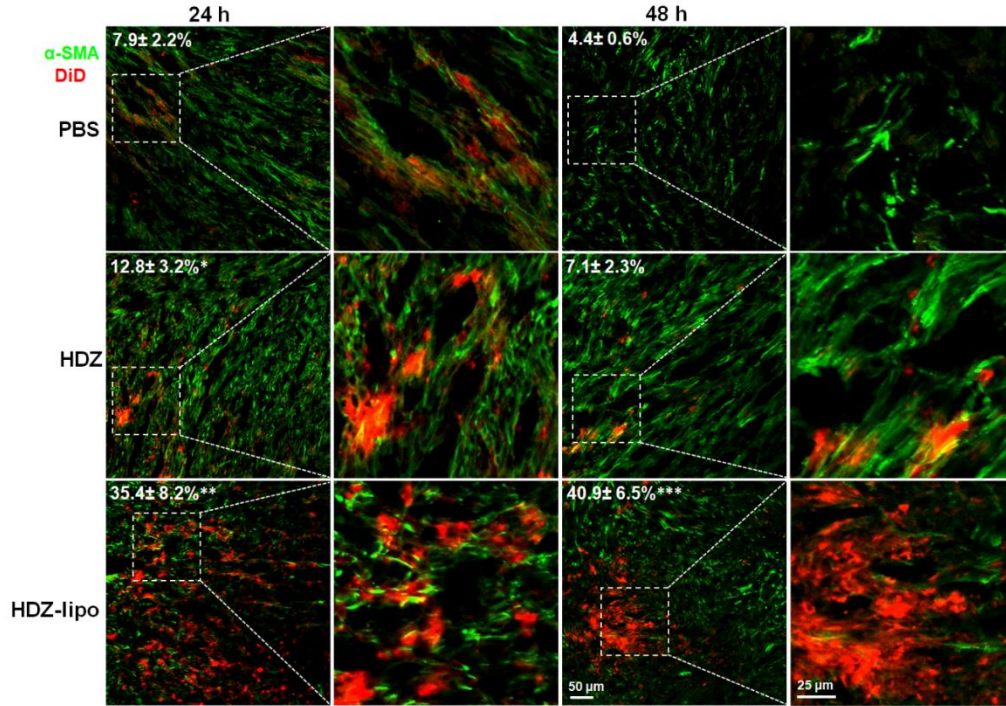

**Figure S5.** DiD-loaded liposome distribution in TAFs ( $\alpha$ -SMA staining) at 24 and 48 h post injection. Mice were pre-treated with PBS, HDZ, and HDZ-liposomes, respectively.  $n = 5$ . \* $p < 0.05$ , \*\* $p < 0.01$ , \*\*\* $p < 0.001$ , compared to PBS group.

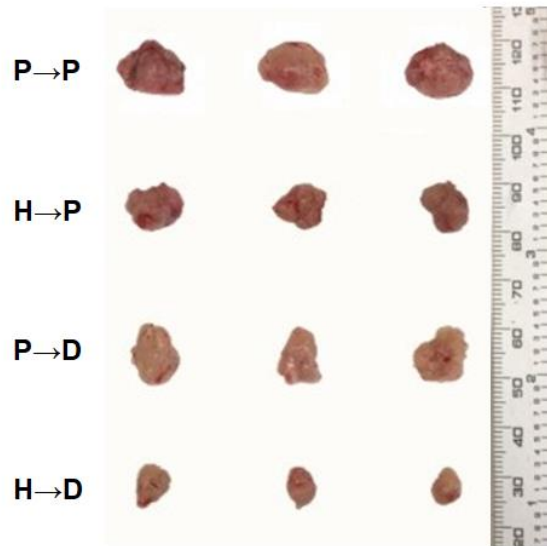

**Figure S6.** Representative *ex vivo* images of BPD6 tumors after various treatments. PBS followed by PBS (P→P), HDZ-liposomes followed by PBS (H→P), PBS followed by DOX-liposomes (P→D) and HDZ-liposomes followed by DOX-liposomes (H→D).



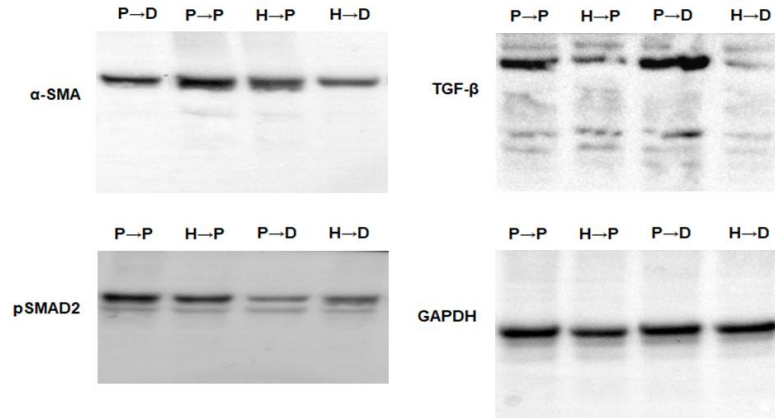

**Figure S7.** Original photographs of western blotting data in Figure 6E.

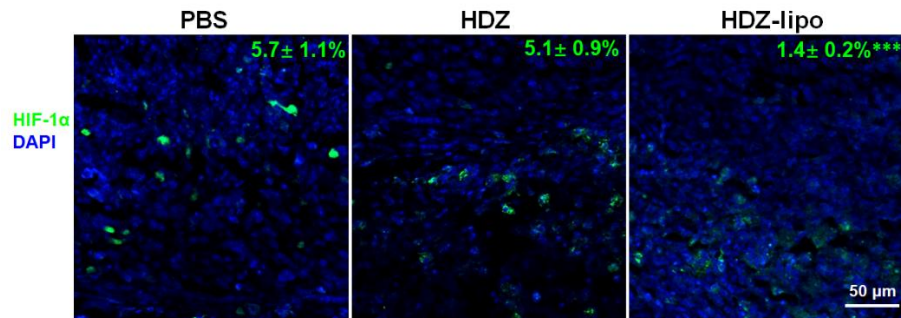

**Figure S8.** Immunofluorescence staining of HIF-1 $\alpha$  in 4T1 tumor after various treatments. n = 5. \*p < 0.05, \*\*p < 0.01, \*\*\*p < 0.001, compared to PBS group.

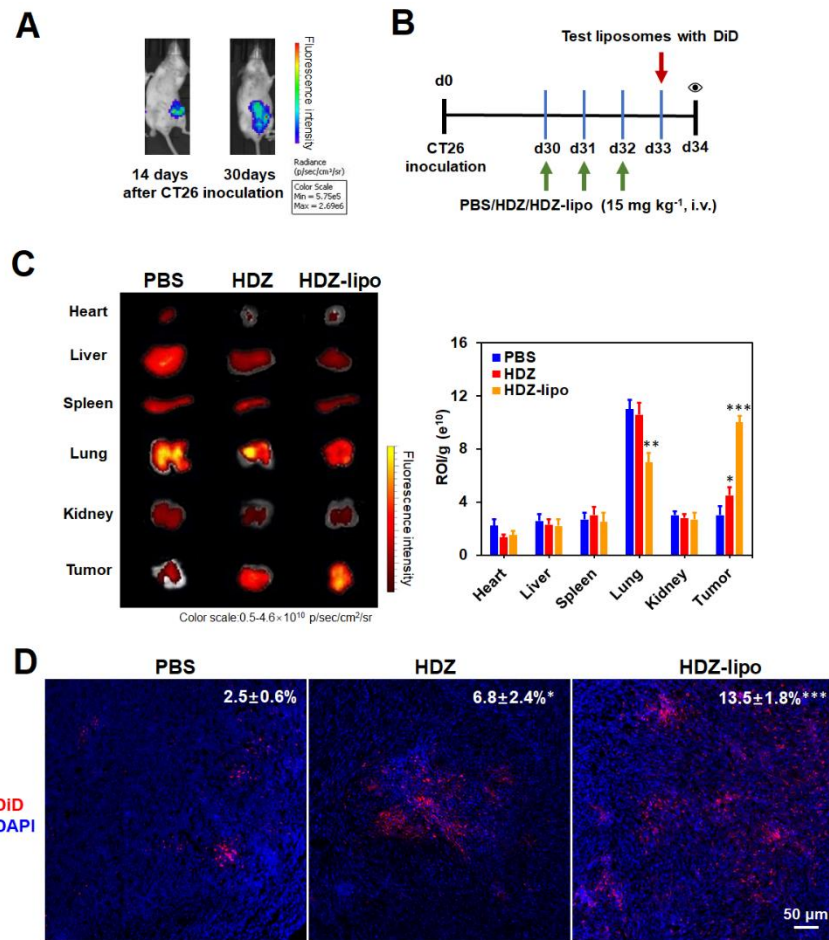

**Figure S9. HDZ-liposomes promote the nanoparticle penetration in orthotopic CT26-FL3 tumor model.** (A) Advanced orthotopic colorectal tumors establishment on day 30 after CT26-FL3 cells inoculated into the mouse cecum wall. The tumor burden was monitored by bioluminescent analysis. (B) Treatment schedule. (C) *Ex vivo* IVIS image and quantitative analysis of DiD-loaded liposomes in tumor and major organs at 24 h post injection; n = 3 mice per group. (D) Distribution of HDZ-liposomes inside tumor in various treatment groups; n = 5. \*p < 0.05, \*\*p < 0.01, \*\*\*p < 0.001, compared to PBS group.

**Table S1.** Antibodies Used in the Study

| <b>Antibodies</b>                     | <b>Company</b>           | <b>Catalog</b> | <b>Application</b> |
|---------------------------------------|--------------------------|----------------|--------------------|
| Alexa Fluor®647 Anti-CD3              | BioLegend                | 100209         | IF                 |
| Alexa Fluor®488 Anti- $\alpha$ -SMA   | Invitrogen               | 4332501        | IF                 |
| Alexa Fluor®594 Anti-CD31             | BioLegend                | 102432         | IF                 |
| Anti-collagen IV                      | Abcam                    | Ab6586         | IF                 |
| Anti-fibronectin                      | Abcam                    | Ab2413         | IF                 |
| Anti-HIF-1 $\alpha$                   | Santa Cruz Biotechnology | SC-10790       | IF                 |
| Goat Anti-Rabbit IgG, Alexa Fluor®488 | Abcam                    | Ab150077       | IF                 |
| Goat Anti-Rabbit IgG, Alexa Fluor®594 | Abcam                    | Ab150080       | IF                 |
| Anti-pSMAD2                           | Cell signaling           | 3108S          | WB                 |
| Anti- $\alpha$ -SMA                   | Abcam                    | Ab124964       | WB                 |
| Anti-TGF $\beta$                      | Santa Cruz Biotechnology | SC-146         | WB                 |
| GAPDH                                 | Santa Cruz Biotechnology | SC-25778       | WB                 |
| Goat anti-rabbit HRP                  | Abcam                    | Ab205718       | WB                 |
| FITC anti-CD8                         | BioLegend                | 100705         | flow cyt           |
| BV421 anti-CD4                        | BioLegend                | 100543         | flow cyt           |
| PE/Cy7 anti-CD3                       | BioLegend                | 100219         | flow cyt           |
| PE/Cy7 anti- NK1.1                    | BioLegend                | 552878         | flow cyt           |
| PE/Cy7 anti-CD11c                     | BioLegend                | 117317         | flow cyt           |
| PerCp anti-MHCII                      | BioLegend                | 107623         | flow cyt           |
| APC/Cy7 anti-CD11b                    | BioLegend                | 101225         | flow cyt           |
| APC anti-Gr-1                         | BioLegend                | 108411         | flow cyt           |
| PerCp/Cy5.5 anti-CD206                | BioLegend                | 141715         | flow cyt           |
| PE anti-F4/80                         | BioLegend                | 123110         | flow cyt           |



**Table S2.** Primers for real-time PCR used in this study

| <b>Primer</b>       | <b>Applied Biosystems</b> |
|---------------------|---------------------------|
| Mouse GAPDH         | Mm99999915_g1             |
| Mouse CCL2          | Mm00441242_m1             |
| Mouse CCL5          | Mm01302427_m1             |
| Mouse IL-4          | Mm00445259_m1             |
| Mouse IL-10         | Mm01288386_m1             |
| Mouse IL-12a        | Mm00434169_m1             |
| Mouse IL-1 $\beta$  | Mm00434228_m1             |
| Mouse CXCL9         | Mm00434946_m1             |
| Mouse CXCL10        | Mm00445235_m1             |
| Mouse CXCL12        | Mm00445553_m1             |
| Mouse CXCL13        | Mm01208154_g1             |
| Mouse TNF- $\alpha$ | Mm00443260_g1             |
| Mouse IFN- $\gamma$ | Mm01168134_m1             |
| Mouse TGF- $\beta$  | Mm01178820_m1             |
